# Supplementary material for: A Paleolatitude Calculator for Paleoclimate Studies
Source: PLoS One. 2015 Jun 10;10(6):e0126946. doi: 10.1371/journal.pone.0126946 (PMC4462584; doi:10.1371/journal.pone.0126946)
Supplement: S1 Table — (XLSX) [file pone.0126946.s001.xlsx]

## Sheet: Sheet1
Total reconstruction Euler poles versus South Africa (701) for the GAPWaP of Torsvik et al. (2012)
	North America			Greenland			North Slope Alaska			Mexican terranes			Baja California			Northwind Ridge			Amerasia Basin			South America			Parana Basin			Yucatan			Sandwich			North Scotia			Colorado/San Jorge subplate			Eurasia			Iberia			Porcupine			Riveria
	101			102			103			104			105			113			119			201			202			205			276			277			291			301			304			317			387
Age	lat	lon	rot	lat	lon	rot	lat	lon	rot	lat	lon	rot	lat	lon	rot	lat	lon	rot	lat	lon	rot	lat	lon	rot	lat	lon	rot	lat	lon	rot	lat	lon	rot	lat	lon	rot	lat	lon	rot	lat	lon	rot	lat	lon	rot	lat	lon	rot	lat
0	0	0	0	0	0	0	0	0	0	0	0	0	0	0	0	0	0	0	0	0	0	0	0	0	0	0	0	0	0	0	0	0	0	0	0	0	0	0	0	0	0	0	0	0	0	0	0	0	0
10	80.89	22.85	2.57	80.89	22.85	2.57	80.89	22.85	2.57	80.89	22.85	2.57	66.2	-46.67	7.89	80.89	22.85	2.57	80.89	22.85	2.57	61.893	-40.34	3.3	61.893	-40.34	3.3	80.89	22.85	2.57	-6.55	-50.23	1.07	61.83	-40.34	3.3	61.893	-40.34	3.3	17.95	-26.36	1.21	17.95	-26.36	1.21	12.14	-27.17	1.27	-31.94
20	80.61	24.4	5.5	80.61	24.4	5.5	80.61	24.4	5.5	80.61	24.4	5.5	71.36	-37.57	10.66	80.61	24.4	5.5	80.61	24.4	5.5	58.54	-37.11	7.48	58.54	-37.11	7.48	80.61	24.4	5.5				58.54	-37.11	7.48	58.54	-37.11	7.48	16.97	-22.76	2.38	16.73	-22.81	2.34	17.54	-19.57	2.43	41.03
30	77.35	12.46	8.6	77.35	12.46	8.6	77.35	12.46	8.6	77.35	12.46	8.6	71.75	-28.28	13.73	77.35	12.46	8.6	77.35	12.46	8.6	56.68	-34.55	11.94	56.68	-34.55	11.94	77.35	12.46	8.6				56.68	-34.55	11.94	56.68	-34.55	11.94	24.93	-19.44	4.3	22.89	-19.49	3.32	26.69	-17.2	4.64
40	74.48	-1.08	12.56	72.57	9.52	11.48	74.48	-1.08	12.56	74.48	-1.08	12.56	70.49	-25.04	17.74	74.48	-1.08	12.56	74.48	-1.08	12.56	57.07	-32.57	16.56	57.07	-32.57	16.56	74.48	-1.08	12.56				57.07	-32.57	16.56	57.07	-32.57	16.56	28.78	-18.49	7.46	31.01	-14.55	6.26	31.33	-17.33	8.33
50	75.92	-3.53	16.24	71.01	20.73	14.15	75.92	-3.53	16.24	75.92	-3.53	16.24	72.09	-23.75	21.41	75.92	-3.53	16.24	75.92	-3.53	16.24	58.18	-31.17	20.48	58.18	-31.17	20.48	75.92	-3.53	16.24							58.18	-31.17	20.48	30.71	-16.73	10.02	31.22	-15.22	6.84	32.85	-16.92	11.15
60	81.61	5.12	19.13	71.85	30.54	17.54	81.61	5.12	19.13	81.61	5.12	19.13	77.19	-22.57	24.16	81.61	5.12	19.13	81.61	5.12	19.13	62.49	-32.81	23.31	62.49	-32.81	23.31	81.61	5.12	19.13							62.49	-32.81	23.31	34.75	-15.72	12.58	36.63	-14.67	7.93	32.56	-15.86	11.21
70	81.63	-6.51	22.37	69.82	29	17.88	81.63	-6.51	22.37	81.63	-6.51	22.37	77.27	-25.86	27.43	81.63	-6.51	22.37	81.63	-6.51	22.37	63.53	-33.44	26.08	63.53	-33.44	26.08	81.63	-6.51	22.37							63.53	-33.44	26.08	35.35	-16.08	14.9	34.72	-17.42	8.48	33.4	-15.87	12.88
80	78.24	-18.76	27.5	67.64	21	19.81	78.24	-18.76	27.5	78.24	-18.76	27.5	74.77	-28.31	32.68	78.24	-18.76	27.5	78.24	-18.76	27.5	62.69	-34.34	31.5	62.69	-34.34	31.5	78.24	-18.76	27.5							62.69	-34.34	31.5	36.37	-15.39	17.33	34.43	-17.78	9.24	36.22	-14.52	16.98
90	74.27	-22.7	33.92	65.57	11.22	24.3	74.27	-22.7	33.92	74.27	-22.7	33.92	71.75	-28.45	39.19	74.27	-22.7	33.92	74.27	-22.7	33.92	58.97	-34.53	37.47	58.97	-34.53	37.47	74.27	-22.7	33.92							58.97	-34.53	37.47	39.57	-13.72	22.57	38.82	-17.13	12.2	40.07	-13.28	22.97
100	69.42	-23.52	40.46	61.96	2.54	30.43	69.42	-23.52	40.46	69.42	-23.52	40.46	67.71	-27.67	45.8	69.42	-23.52	40.46	69.42	-23.52	40.46	55.49	-34.8	43.69	55.49	-34.8	43.69	69.42	-23.52	40.46							55.49	-34.8	43.69	39.71	-12.19	29	39.08	-13.81	17.76	40.23	-12.05	29.85
110	67.51	-22.12	47.52	61.23	0.57	37.11	67.51	-22.12	47.52	67.51	-22.12	47.52				67.51	-22.12	47.52	67.51	-22.12	47.52	52.85	-34.97	50.02	52.85	-34.97	50.02	67.51	-22.12	47.52							52.85	-34.97	50.02	41.94	-9.57	35.23	42.63	-10.08	23.13	42.31	-9.51	36.1
120	66.01	-20.57	54.23	60.56	-0.04	43.51	66.01	-20.57	54.23	66.01	-20.57	54.23				66.01	-20.57	54.23	65.36	-16.64	53.14	51.65	-35	52.81	51.65	-35	52.81	66.01	-20.57	54.23							51.65	-35	52.81	43.43	-7.16	41.03	-9.15	-32.08	0.26	43.71	-7.14	41.91
130	64.82	-17.42	59.16	59.75	1.59	48.54	64.35	-14.23	57.74	64.82	-17.42	59.16				66.96	-20.5	62.48	59.51	2.64	53.56	50.14	-32.85	54.85	48.47	-33.36	55.45	64.82	-17.42	59.16							48.46	-33.36	56.11	44.44	-4.49	45.99	62.8	-23.45	-2.5	44.65	-4.53	46.87
140	65.11	-16.4	61.83	60.47	2.23	51.18	60.56	2.73	53.22	65.11	-16.4	61.83				69.35	-14.78	67.17	53.43	16.49	52.85	50	-32.5	55.08	47.5	-33.3	56.09	65.11	-16.4	61.83							47.5	-33.3	57.14	45.92	-3.45	48.36	34.65	-68.34	-0.71	46.1	-3.48	49.25
150	65.08	-16.12	64.94	60.92	1.95	54.27	44.55	25.26	44.84	65.08	-16.12	64.94				63.62	8.84	60.13	51.47	20.57	54.81	50	-32.5	55.08	47.5	-33.3	56.2	71.53	25.99	57.65							47.5	-33.3	57.3	47.02	-2.83	51.24	-9.33	49.67	0.53	47.26	-3	52.19
160	65.84	-13.76	68.38	62.07	4.11	57.67	47.05	27.12	47.81	66.08	-14.16	67.84				64.5	10.81	63.6				50	-32.5	55.08	47.5	-33.3	56.2	65.28	75.36	58.63							47.5	-33.3	57.3	48.86	-0.34	54.08	54.9	-0.05	6.66	49.22	-0.81	55.15
170	65.87	-12.79	72.35	62.55	4.51	61.62	49.05	27.3	51.42	66.42	-13.72	71.06				64.89	10.8	67.57				50	-32.5	55.08	47.5	-33.3	56.2	48.96	101.23	65.27							47.5	-33.3	57.3	49.98	1.03	57.7	52.67	-4.16	13.89
180	64.76	-13.44	74.95	61.67	3.02	64.33	49.19	25.47	54.17	65.26	-14.33	73.65				64.16	8.71	70.21				50	-32.5	55.08	47.5	-33.3	56.2	46.49	105.03	68.51							47.5	-33.3	57.3	49.44	0.36	60.6	52.67	-4.16	13.89
190	63.71	-14.01	77.58	60.83	1.72	67.05	49.3	23.81	56.94	64.17	-14.85	76.27				63.45	6.85	72.87				50	-32.5	55.08	47.5	-33.3	56.2	46.49	105.03	68.51							47.5	-33.3	57.3	48.94	-0.23	63.51	52.67	-4.16	13.89
200	63.2	-14.13	79.22	60.45	1.23	68.75	49.44	23.09	58.64	63.63	-14.94	77.91				63.12	6.06	74.54				50	-32.5	55.08	47.5	-33.3	56.2	46.49	105.03	68.51							47.5	-33.3	57.3	47.9	0.98	62.68	52.67	-4.16	13.89
[truncated: 137 more columns]
