# Supplementary material for: A Paleolatitude Calculator for Paleoclimate Studies
Source: PLoS One. 2015 Jun 10;10(6):e0126946. doi: 10.1371/journal.pone.0126946 (PMC4462584; doi:10.1371/journal.pone.0126946)
Supplement: S2 Table — (XLSX) [file pone.0126946.s002.xlsx]

## Sheet: Sheet1
Total reconstruction Euler poles versus South Africa (701) for the APWP of Besse and Courtillot (2002)
	North America			Greenland			North Slope Alaska			Mexican terranes			Baja California			Northwind Ridge			Amerasia Basin			South America			Parana Basin			Yucatan			Sandwich			North Scotia			Colorado/San Jorge subplate			Eurasia			Iberia			Porcupine			Riveria
	101			102			103			104			105			113			119			201			202			205			276			277			291			301			304			317			387
Age	lat	lon	rot	lat	lon	rot	lat	lon	rot	lat	lon	rot	lat	lon	rot	lat	lon	rot	lat	lon	rot	lat	lon	rot	lat	lon	rot	lat	lon	rot	lat	lon	rot	lat	lon	rot	lat	lon	rot	lat	lon	rot	lat	lon	rot	lat	lon	rot	lat
0	0	0	0	0	0	0	0	0	0	0	0	0	0	0	0	0	0	0	0	0	0	0	0	0	0	0	0	0	0	0	0	0	0	0	0	0	0	0	0	0	0	0	0	0	0	0	0	0	0
10	78	11.5	2.52	78	11.5	2.52	78	11.5	2.52	78	11.5	2.52	65.07	-45.69	7.88	78	11.5	2.52	78	11.5	2.52	61.83	-40.34	3.3				78	11.5	2.52	-6.55	-50.23	1.07	61.83	-40.34	3.3	61.83	-40.34	3.3	-81.69	-84.43	-3.72	-81.69	-84.43	-3.72	7.97	-26.42	1.4	-32.35
20	78	11.5	5.04	78	11.5	5.04	78	11.5	5.04	78	11.5	5.04	69.09	-37.96	10.28	78	11.5	5.04	78	11.5	5.04	58.54	-37.11	7.48				78	11.5	5.04				58.54	-37.11	7.45	58.54	-37.11	7.48	-81.92	-86.21	-7.92	-81.82	-84.6	-7.9	5.14	-21.36	2.58	41.43
30	78	11.5	7.56	78	11.5	7.56	78	11.5	7.56	78	11.5	7.56	71.35	-31.64	12.72	78	11.5	7.56	78	11.5	7.56	56.68	-34.55	11.94				78	11.5	7.56				56.678	-34.55	11.94	56.68	-34.55	11.94	-82.51	-82.76	-12.82	-80.18	-60.56	-12.39	15.67	-20.33	4.04
40	78.34	9.79	10.56	75.62	24.65	9.48	78.34	9.79	10.56	78.34	9.79	10.56	73	-26.72	15.67	78.34	9.79	10.56	78.34	9.79	10.56	57.07	-32.57	16.56				78.34	9.79	10.56				57.07	-32.57	16.56	57.07	-32.57	16.56	-82.59	-73.17	-18.04	-79.29	-57.6	-17.83	24.11	-18.5	6.33
50	79.2	4.62	15.16	73.03	32.96	13.06	79.2	4.62	15.16	79.2	4.62	15.16	74.64	-23.62	20.24	79.2	4.62	15.16	79.2	4.62	15.16	58.18	-31.17	20.48	58.18	-31.17	20.48	79.2	4.62	15.16							58.18	-31.17	20.48	-81.84	-55.65	-24.29	-75.75	-34.07	-23.22	32.5	-17.04	9.67
60	79.58	-2.74	19.03	70.38	23.82	17.49	79.58	-2.74	19.03	79.58	-2.74	19.03	75.31	-24.13	24.12	79.58	-2.74	19.03	79.58	-2.74	19.03	62.49	-32.81	23.31	62.49	-32.81	23.31	79.58	-2.74	19.03							62.49	-32.81	23.31	-84.39	-45.91	-31.69	-77.18	-20.44	-29.88	29.68	-16.69	11.75
70	79.65	-10.45	22.41	68.2	23.46	18.01	79.65	-10.45	22.41	79.65	-10.45	22.41	75.58	-26.23	27.53	79.65	-10.45	22.41	79.65	-10.45	22.41	63.53	-33.44	26.08	63.53	-33.44	26.08	79.65	-10.45	22.41							63.53	-33.44	26.08	-86.12	-29.98	-38.26	-77.58	-5.78	-35.24	31.23	-16.11	13.52
80	78.7	-17.31	26.46	67.14	23.52	18.8	78.7	-17.31	26.46	78.7	-17.31	26.46	75.08	-27.94	31.63	78.7	-17.31	26.46	78.7	-17.31	26.46	62.69	-34.34	31.5	62.69	-34.34	31.5	78.7	-17.31	26.46							62.69	-34.34	31.5	-87.97	9.84	-45.08	-78.55	10.76	-40.78	34.3	-14.39	16.07
90	73.6	-23.8	34.55	65.25	8.93	24.93	73.6	-23.8	34.55	73.6	-23.8	34.55	71.19	-29.08	39.84	73.6	-23.8	34.55	73.6	-23.8	34.55	59.05	-34.52	37.33	59.05	-34.52	37.33	73.6	-23.8	34.55							59.05	-34.52	37.33	84.76	-63.05	54.58	-79.68	51.59	-48.1	40.15	-13.76	23.71
100	-70.82	158.02	-41.16	-63.71	-174.98	-31.03	-70.82	158.02	-41.16	-70.82	158.02	-41.16	-68.99	153.6	-46.47	-70.82	158.02	-41.16	-70.82	158.02	41.16	55.66	-34.79	43.34	55.66	-34.79	43.34	-70.82	158.02	-41.16							55.66	-34.79	43.34	-81.63	130.12	-61.45	-79.49	77.08	-53.84	-42.48	169.15	-29.97
110	-68.9	159.17	-47.8	-32.81	-177.22	-37.27	-68.9	159.17	-47.8	-68.9	159.17	-47.8				-68.9	159.17	-47.8	-68.9	159.17	-47.8	53.06	-34.96	49.45	53.06	-34.96	49.45	-68.9	159.17	-47.8							53.06	-34.96	49.45	-78.99	135.13	-68.46	-78	94.6	-59.78	-44.08	171.56	-35.86
120	-67.16	160.1	-54.11	-31.85	-178.7	-43.31	-67.16	160.1	-54.11	-67.16	160.1	-54.11				-67.16	160.1	-54.11	-66.51	164.21	-53	51.64	-35	52.83	51.64	-35	52.83	-67.16	160.1	-54.11							51.64	-35	52.83	-76.64	138.09	-75.04	58.45	-117.12	47.55	-44.96	173.49	-41.38
130	65.16	-18.51	58.33	60.2	0.57	47.78	64.69	-15.27	56.9	65.16	-18.51	58.33				67.31	-21.65	61.67	59.82	2.02	52.64	50.13	-32.83	55.33	48.47	-33.36	55.45	65.16	-18.51	58.33							48.46	-33.36	56.11	74.58	-38.82	78.79	61.57	-1.71	-3.36	44.71	-5.36	45.99
140	64.95	-18.19	60.89	60.39	0.28	50.34	60.41	1.11	52.22	64.95	-18.19	60.89				69.3	-16.67	66.18	53.25	15.21	51.84	46.8	-30.5	55.8	47.5	-33.3	56.09	64.95	-18.19	60.89							47.5	-33.3	57.14	74.05	-38.18	81.26	78.42	7.12	1.51	45.6	-4.92	48.44
150	64.77	-17.9	63.45	60.57	0.02	52.9	43.56	23.94	43.46	64.77	-17.9	63.45				63.37	7.32	58.55	50.88	19.3	53.34	46.8	-30.5	55.8	47.5	-33.3	56.2	71.52	24.56	55.98							47.5	-33.3	57.3	73.54	-37.61	83.73	82.7	156.34	1.75	46.41	-4.51	50.91
160	64.74	-17.62	66.17	60.93	-0.17	55.61	45.26	23.62	45.85	64.97	-18.05	65.63				63.68	6.79	61.26				46.8	-30.5	55.8	47.5	-33.3	56.2	65.32	72.85	55.71							47.5	-33.3	57.3	73.16	-37.13	86.41	30.08	-14.67	5.28	47.38	-4.08	53.49
170	64.99	-17.34	69.22	61.6	-0.26	58.6	47.29	23.51	48.45	65.5	-18.39	67.92				64.28	6.45	64.25				46.8	-30.5	55.8	47.5	-33.3	56.2	47.49	100.09	61.6							47.5	-33.3	57.3	72.96	-36.76	89.45	40.18	-14.58	11.52
180	65.23	-17.08	72.26	62.22	-0.35	61.59	49.12	23.41	51.09	65.71	-18.12	70.97				64.82	6.12	67.24				46.8	-30.5	55.8	47.5	-33.3	56.2	47.47	101	68.15							47.5	-33.3	57.3	72.78	-36.41	92.49	48.59	-18.88	10.65
190	65.44	-16.83	75.31	62.78	-0.43	64.59	50.78	23.31	53.77	65.91	-17.87	74.02				65.33	5.81	70.24				46.8	-30.5	55.8	47.5	-33.3	56.2	47.47	101	68.15							47.5	-33.3	57.3	72.6	-36.09	95.54	57.67	-26.93	10.09
200	65.44	-16.83	75.31	62.78	-0.43	64.59	50.78	23.31	53.77	65.91	-17.87	74.02				65.33	5.81	70.24				46.8	-30.5	55.8	47.5	-33.3	56.2	47.47	101	68.15							47.5	-33.3	57.3	72.6	-36.09	95.54	56.37	-29.55	9.4
[truncated: 137 more columns]
