# Supplementary material for: A Paleolatitude Calculator for Paleoclimate Studies
Source: PLoS One. 2015 Jun 10;10(6):e0126946. doi: 10.1371/journal.pone.0126946 (PMC4462584; doi:10.1371/journal.pone.0126946)
Supplement: S4 Table — (XLSX) [file pone.0126946.s004.xlsx]

## Sheet: Sheet1
Apparent Polar Wander Path Torsvik et al 2012					Apparent Polar Wander Path Besse Courtillot 2002					Apparent Polar Wander Path Kent Irving 2010
		APWP					APWP					APWP
		701					701					701
Age	A95	Plat	Plon		Age	A95	Plat	Plon		Age	A95	Plat	Plon
0	1.9	88.5	173.9		0	2.6	86.2	176.9
10	1.8	86.6	170		10	2	85.3	173.5
20	2.6	84.2	175.6		20	2.7	83.9	175.9
30	2.6	82.9	180.3		30	3.8	81.8	190.7
40	2.9	80.5	189		40	3.3	79	201.1
50	2.8	75.5	205.6		50	3.4	76.9	210.3		50	5.4	78.495	207.3
60	2.1	72.9	215.3		60	2.8	74.3	225.7		60	5.5	76.063	219.68
70	2.5	71.7	223.3		70	3.2	71.9	233.7		70	4.6	73.551	235.02
80	2.9	70.6	229.2		80	6	70.3	241.6		80	4.5	70.759	232.95
90	2.5	69.4	235.6		90	5.3	66.7	248.7		90	3.4	66.751	240.57
100	3.3	67	243.2		100	6.8	65.4	248		100	4.4	59.904	255.4
110	3.3	58.2	258.7		110	4.1	57.9	259		110	4.5	57.067	260.32
120	2.6	53.6	261.3		120	2.3	54	261.1		120	2.7	47.014	265.03
130	2.8	49.3	260.9		130	3.2	50	262.1		130	2.4	43.433	266.67
140	6	45.8	262.1		140	6.5	45.7	264.5		140	6.8	35.478	267.73
150	6.4	53.1	257.2		150	6.8	52.9	260.6		150	9	30.757	270.65
160	5.1	55.4	255.9		160	5	55.1	259.9		160	7.5	59.211	264.92
170	4.6	55.9	253.9		170	6	60.8	260.9		170	6.5	59.271	264.7
180	3.4	62.1	258.5		180	5.4	66	260.1		180	5.5	57.952	273.23
190	2.9	66.8	256.6		190	4.2	64.7	259		190	6.7	59.498	273.75
200	2.8	69	242.2		200	4.3	62.2	252.4		200	3.8	65.547	250.6
